# Supplementary material for: Measurement of ambient NO 3 reactivity: Design, characterization and first deployment of a new instrument
Source: Copernicus journal article supplement (doi:10.5194/amt-2016-381), 2016-11-29
Supplement: Supplementary file 1 [file amt-2016-381-supplement.pdf]

# Measurement of ambient NO<sub>3</sub> reactivity: Design, characterization and first deployment of a new instrument

Jonathan M. Liebmann<sup>1</sup>, Gerhard Schuster<sup>1</sup>, Jan B. Schuladen<sup>1</sup>, Nicolas Sobanski<sup>1</sup>, Jos Lelieveld<sup>1</sup> and John N. Crowley<sup>1</sup>

<sup>1</sup>Atmospheric Chemistry Department, Max-Planck-Institut für Chemie, 55128 Mainz, Germany.

Correspondence to: John N. Crowley (john.crowley@mpic.de)

## Supplementary Information

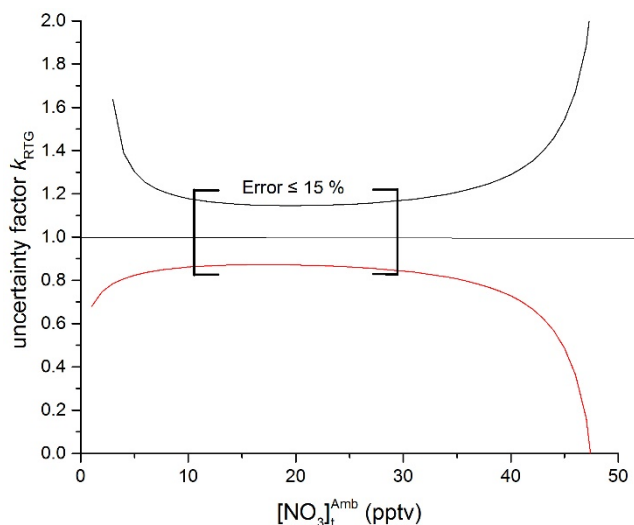

**Fig. S1:** Upper and lower bounds to the uncertainty in the reactivity measurement calculated for a fixed minimal detectable change ( $\text{MDC}_{\text{NO}_3} = 2.5$  pptv) in NO<sub>3</sub> (initially  $[\text{NO}_3]_t^{\text{ZA}} = 50$  pptv) for different reactivities resulting in various measured NO<sub>3</sub> mixing ratios at 10.5 s ( $[\text{NO}_3]_t^{\text{Amb}}$ ). The horizontal line ( $y = 1$ ) is the ideal case where the  $\text{MDC}_{\text{NO}_3}$  tends to zero. The square brackets indicate the dynamic range in which the uncertainty associated with signal stability is  $\leq 15\%$ . When  $[\text{NO}_3]_t^{\text{Amb}}$  and  $[\text{NO}_3]_t^{\text{ZA}}$  are very similar (reactivity tends to zero) or when NO<sub>3</sub> is entirely depleted (very high reactivity) the uncertainty increases rapidly.
